# Supplementary material
Source: PubMed Central journal article supplement (PMC3896166)
Supplement: 1314284111_pnas.201314284SI.pdf [file 1314284111_pnas.201314284SI.pdf]

# Supporting Information

Larmola et al. 10.1073/pnas.1314284111

## SI Materials and Methods

To assess whether indigenous  $\text{CH}_4$  was formed during the incubations, we sampled a subset ( $n = 3$ ) of the moss vials in the  $^{15}\text{N}_2$ -only treatment (no  $\text{CH}_4$  added) for the headspace  $\text{CH}_4$  concentration after the incubation period of 45 h. An air sample of outdoor air on site was also drawn to serve as a control for initial headspace conditions. The gas samples were analyzed by using gas chromatography as described in *Materials and Methods*.

In the vials, the final  $\text{CH}_4$  concentrations ranged from 0 to 0.5 ppm, indicating that during the incubation the headspace  $\text{CH}_4$  concentration did not increase but decreased from the initial atmospheric concentration of 2.0 ppm (outdoor air). This change in the headspace  $\text{CH}_4$  concentration corresponded to net  $\text{CH}_4$  oxidation rates of 0.17–0.24  $\text{nmol}\cdot\text{g}^{-1}$  of moss biomass $\cdot\text{h}^{-1}$ . Thus, it is unlikely that possible indigenous methane had a major contribution to the  $\text{N}_2$  fixation rates.

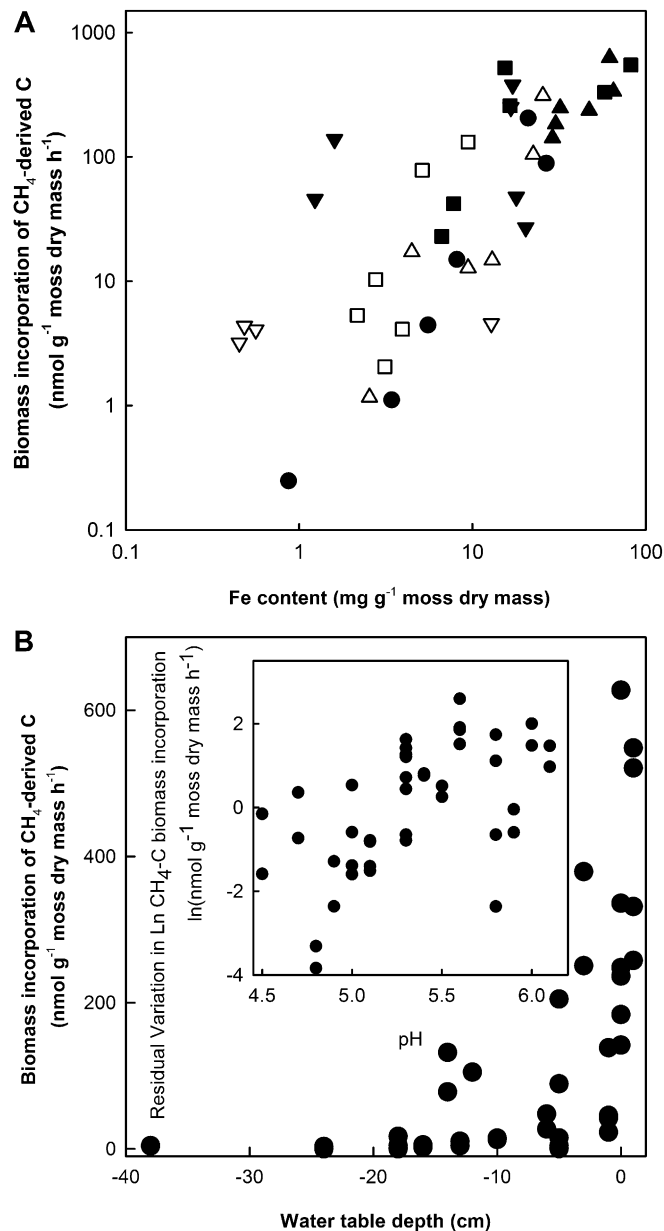

**Fig. S1.** The relationship between the rate of  $\text{CH}_4$  oxidation (measured as biomass incorporation of  $\text{CH}_4$ -derived C) and selected environmental variables. (A) The rate of biomass incorporation of  $\text{CH}_4$ -derived C and Fe content in moss samples of different successional peatland stages (●, meadow; ■, mesotrophic fen; ▲, oligotrophic fen, and ▼, fen-bog transition). The samples collected from flark microhabitats are indicated by filled symbols. (B) The rate of the biomass incorporation of  $\text{CH}_4$ -derived C (shown untransformed) and water table depth of *Sphagnum* moss samples. Negative values indicate depth of the water table below the moss surface. *Inset* shows the relationship between pH and variation in the biomass incorporation of  $\text{CH}_4$ -derived C [natural log (ln) transformed] not related to the water table depth ( $\ln \text{CH}_4\text{-C biomass incorporation} = \text{WT} + \text{pH}$ ,  $R^2 = 0.58$ ,  $\text{df}_{\text{reg, res}} = 1, 39$ ).

**Table S1. Study sites at Siikajoki peatland chronosequence**

| Successional stage | Terrestrial age (1), y | Elevation (1), m a.s.l. | Peat thickness, cm | No. of peatlands | No. of <i>Sphagnum</i> samples | <i>Sphagnum</i> species   |
|--------------------|------------------------|-------------------------|--------------------|------------------|--------------------------------|---------------------------|
| Meadow             | 200                    | 1.5–2                   | 12 (0.4)           | 3                | 3                              | <i>sub, squ</i>           |
| Mesotrophic fen    | 700                    | 7                       | 58 (3)             | 3                | 6                              | <i>pla, maj, fim, pap</i> |
| Oligotrophic fen   | 1,070–1,300            | 12                      | 86 (5)             | 3                | 6                              | <i>sub, pap, obt</i>      |
| Fen-bog transition | 2,410–2,520            | 25                      | 117 (37)           | 3                | 6                              | <i>sub, maj, obt, fus</i> |

Values in parentheses show SDs. Species are *fim*, *Sphagnum fimbriatum*; *fus*, *Sphagnum fuscum*; *maj*, *Sphagnum majus*; *obt*, *Sphagnum obtusum*; *pap*, *Sphagnum papillosum*; *pla*, *Sphagnum platyphyllum*; *squ*, *Sphagnum squarrosum*; *sub*, *Sphagnum subsecundum*. a.s.l., above sea level.

1. Tuittila E-S, et al. (2013) Wetland chronosequence as a model of peatland development: Vegetation succession, peat and carbon accumulation. *Holocene* 23(1):25–35.

**Table S2. Nested ANCOVAs on the effects of terrestrial age and treatments on N<sub>2</sub> fixation and biomass incorporation of CH<sub>4</sub>-derived C**

| Source                    | LnN <sub>2</sub> fixation |       |        | Ln CH <sub>4</sub> -C biomass incorporation |       |        |
|---------------------------|---------------------------|-------|--------|---------------------------------------------|-------|--------|
|                           | df                        | F     | P      | df                                          | F     | P      |
| Corrected model           | 14                        | 9.5   | <0.001 | 13                                          | 17.9  | <0.001 |
| Intercept                 | 1                         | 356.8 | <0.001 | 1                                           | 727.6 | <0.001 |
| Water table               | 1                         | 53.8  | <0.001 | 1                                           | 113.1 | <0.001 |
| Successional stage        | 3                         | 6.8   | <0.001 | 3                                           | 10.1  | <0.001 |
| Site (successional stage) | 8                         | 7.3   | <0.001 | 8                                           | 11.8  | <0.001 |
| CH <sub>4</sub> addition  | 1                         | 4.4   | 0.039  | NA                                          | —     | —      |
| Light                     | 1                         | 17.2  | <0.001 | 1                                           | 0.2   | 0.668  |
| Error                     | 64                        | —     | —      | 28                                          | —     | —      |
| Total                     | 79                        | —     | —      | 42                                          | —     | —      |
| Corrected total           | 78                        | —     | —      | 41                                          | —     | —      |
| R <sup>2</sup>            | 0.60                      | —     | —      | 0.84                                        | —     | —      |

All interactions among factors were nonsignificant and excluded from the final models. Five observations with high N<sub>2</sub> fixation rates were excluded as outliers.

**Table S3. Rates of N<sub>2</sub> fixation in different successional stages**

| Successional stage ( <i>microhabitat</i> ) | N <sub>2</sub> fixation, nmol·g <sup>-1</sup> of moss dry mass·h <sup>-1</sup> |      |     |                                                                        |     |     |
|--------------------------------------------|--------------------------------------------------------------------------------|------|-----|------------------------------------------------------------------------|-----|-----|
|                                            | <sup>15</sup> N <sub>2</sub> treatment                                         |      |     | <sup>15</sup> N <sub>2</sub> + <sup>13</sup> CH <sub>4</sub> treatment |     |     |
|                                            | Mean (SEM)                                                                     | Min  | Max | Mean (SEM)                                                             | Min | Max |
| Under prevailing light conditions          |                                                                                |      |     |                                                                        |     |     |
| Meadow                                     | 0.8 (0.5)                                                                      | 0.2  | 1.8 | 3.3 (0.5)                                                              | 2.3 | 3.9 |
| Mesotrophic fen <i>flark</i>               | 35 (26)                                                                        | 5.8  | 87  | 49 (39)                                                                | 7.7 | 126 |
| <i>hummock</i>                             | 5.5 (2.8)                                                                      | 0.2  | 9.2 | 9.1 (5.8)                                                              | 0.3 | 20  |
| Oligotrophic fen <i>flark</i>              | 3.0 (1.9)                                                                      | 0.9  | 6.8 | 6.5 (3.2)                                                              | 1.6 | 12  |
| <i>hummock</i>                             | 1.8 (0.4)                                                                      | 0.9  | 2.3 | 2.9 (0.3)                                                              | 2.4 | 2.4 |
| Fen-bog transition <i>flark</i>            | 6.0 (3.6)                                                                      | 0.1  | 13  | 5.7 (3.0)                                                              | 0.4 | 11  |
| <i>hummock</i>                             | 0.6 (0.1)                                                                      | 0.5  | 0.9 | 0.7 (0.4)                                                              | 0.1 | 1.5 |
| In dark                                    |                                                                                |      |     |                                                                        |     |     |
| Meadow                                     | 2.0 (1.1)                                                                      | 0.01 | 4.1 | 2.5 (0.6)                                                              | 1.4 | 3.5 |
| Mesotrophic fen <i>flark</i>               | 11 (7.4)                                                                       | 2.9  | 25  | 16 (13)                                                                | 2.8 | 43  |
| <i>hummock</i>                             | 1.2 (1.0)                                                                      | 0    | 3.3 | 3.5 (3.3)                                                              | 0.2 | 10  |
| Oligotrophic fen <i>flark</i>              | 2.0 (0.2)                                                                      | 1.6  | 2.3 | 4.6 (3.0)                                                              | 1.4 | 11  |
| <i>hummock</i>                             | 0.9 (0.1)                                                                      | 0.6  | 1.1 | 0.8 (0.2)                                                              | 0.5 | 1.1 |
| Fen-bog transition <i>flark</i>            | 2.0 (1.0)                                                                      | 0.2  | 3.7 | 2.5 (1.3)                                                              | 0.2 | 4.5 |
| <i>hummock</i>                             | 0.3 (0.1)                                                                      | 0    | 0.4 | 0.1 (0.04)                                                             | 0   | 0.1 |

The mean, minimum, and maximum rates as well as SE of mean (SEM, *n* = 3 peatlands in each stage) for the four treatments: <sup>15</sup>N<sub>2</sub> and <sup>15</sup>N<sub>2</sub>+<sup>13</sup>CH<sub>4</sub> addition both under prevailing light conditions and in dark are shown.
